# Supplementary material for: Mitochondrial dysregulation occurs early in ALS motor cortex with TDP-43 pathology and suggests maintaining NAD+ balance as a therapeutic strategy
Source: PubMed Central journal article supplement (PMC8917163; doi:10.1038/s41598-022-08068-5), 2022-03-11
Supplement: 41598_2022_8068_MOESM1_ESM.pdf [file 41598_2022_8068_MOESM1_ESM.pdf]

| Total Iron Count (another option for normalization) | TIC             | Ozd-Muk-20190207-01.raw | Ozd-Muk-20190207-02.raw | Ozd-Muk-20190207-03.raw | Ozd-Muk-20190207-04.raw | Ozd-Muk-20190207-05.raw | Ozd-Muk-20190207-06.raw | Ozd-Muk-20190207-07.raw | Ozd-Muk-20190207-08.raw |
|-----------------------------------------------------|-----------------|-------------------------|-------------------------|-------------------------|-------------------------|-------------------------|-------------------------|-------------------------|-------------------------|
|                                                     |                 | WT 1                    | WT 2                    | WT 3                    | WT 4                    | TDP-43-1                | TDP-43-2                | TDP-43-3                | TDP-43-4                |
| KEGG ID                                             |                 |                         |                         |                         |                         |                         |                         |                         |                         |
| 2-HG                                                | C02630          | 233,338,781             | 265,339,744             | 251,461,784             | 252,495,520             | 230,836,168             | 265,801,089             | 297,563,156             | 257,662,936             |
| 3-phospho-serine                                    | C01005          | 15,029                  | 88,400                  | 73,320                  | 50,071                  | 79,189                  | 108,074                 | 104,553                 | 298,167                 |
| 5-methylcytosine                                    | C02376          | 198,089                 | 168,755                 | 240,618                 | 261,241                 | 102,704                 | 72,453                  | 175,162                 | 293,213                 |
| 6-O-methylguanine                                   | n/a             | 0                       | 0                       | 0                       | 0                       | 0                       | 0                       | 0                       | 0                       |
| 6-phosphogluconic acid                              | C00345          | 512,411                 | 857,435                 | 708,932                 | 626,506                 | 378,192                 | 329,319                 | 908,180                 | 2,288,451               |
| 7-methylguanine                                     | C02242          | 423,864                 | 545,983                 | 490,371                 | 441,151                 | 341,059                 | 504,734                 | 583,955                 | 1,017,938               |
| acetoacetic acid                                    | C00164          | 0                       | 1,735,956               | 1,870,857               | 1,953,313               | 1,527,718               | 1,006,422               | 0                       | 0                       |
| acetylcholine+                                      | C01996          | 289,275,123             | 232,697,712             | 275,841,093             | 295,380,184             | 323,835,041             | 328,311,539             | 354,141,497             | 369,806,344             |
| aconitic acid                                       | C00417-C02341   | 1,736,130               | 2,241,484               | 2,300,695               | 0                       | 16,090,504              | 26,938,254              | 29,959,008              | 33,356,585              |
| adenine                                             | C00147          | 104,691,720             | 152,149,296             | 159,164,754             | 154,795,702             | 67,522,308              | 134,106,223             | 110,346,876             | 203,827,297             |
| adenosine                                           | C00212          | 992,415,441             | 1,124,785,734           | 1,125,453,604           | 1,260,125,577           | 798,932,402             | 1,020,875,733           | 1,311,831,642           | 1,337,464,830           |
| adenylosuccinic acid                                | C03794          | 39,818                  | 19,946                  | 61,756                  | 32,916                  | 49,755                  | 14,604                  | 32,730                  | 14,920                  |
| AICA ribonucleotide                                 | C04677          | 0                       | 0                       | 0                       | 0                       | 0                       | 0                       | 0                       | 0                       |
| a-KG                                                | C00026          | 28,101,464              | 33,401,504              | 33,955,774              | 35,676,423              | 34,198,407              | 39,063,463              | 45,885,122              | 56,207,732              |
| allantoin                                           | C01551          | 3,705,295               | 6,577,713               | 5,735,487               | 4,366,483               | 5,851,460               | 6,234,188               | 10,053,635              | 14,729,889              |
| arginine                                            | C02385          | 762,022,977             | 761,616,718             | 796,023,072             | 799,412,500             | 471,315,088             | 831,196,675             | 927,391,306             | 992,455,004             |
| asparagine                                          | C16438          | 8,010,935               | 12,265,908              | 12,623,470              | 10,257,601              | 9,436,676               | 12,455,231              | 15,676,921              | 13,731,604              |
| aspartic acid                                       | C16433          | 366,377,134             | 503,623,316             | 505,995,339             | 425,249,904             | 494,060,036             | 452,376,861             | 522,235,570             | 454,142,285             |
| ATP / dGTP                                          | C00002 / C00286 | 3,652,196               | 3,768,264               | 2,777,869               | 2,840,176               | 2,670,874               | 2,586,805               | 3,070,322               | 6,370,153               |
| betaine                                             | C00719          | 600,124,290             | 681,036,103             | 700,241,088             | 669,998,493             | 670,427,247             | 859,095,592             | 962,599,569             | 825,980,326             |
| carnitine+                                          | C00487          | 1,967,138,524           | 2,388,339,546           | 2,257,498,389           | 1,976,161,901           | 1,790,668,487           | 2,758,203,294           | 2,482,327,396           | 2,994,299,444           |
| CDP                                                 | C00112          | 227,148                 | 121,272                 | 102,819                 | 54,420                  | 122,791                 | 0                       | 66,784                  | 44,392                  |
| choline+                                            | C00114          | 3,138,556,733           | 4,171,365,520           | 4,541,506,659           | 4,114,004,935           | 3,768,779,936           | 4,310,236,285           | 5,037,893,913           | 4,709,671,026           |
| citraconic acid                                     | C02226          | 0                       | 0                       | 0                       | 0                       | 0                       | 0                       | 0                       | 0                       |
| citrate / citrate(iso)                              | C00158 / C00311 | 663,758,375             | 839,603,834             | 927,206,912             | 875,909,182             | 933,029,506             | 985,983,705             | 1,171,294,715           | 1,361,714,533           |
| citulline                                           | C00327          | 8,081,443               | 9,540,408               | 10,412,592              | 8,061,704               | 6,905,605               | 8,572,293               | 8,964,303               | 11,122,377              |
| CMP                                                 | C00055          | 4,073,333               | 3,175,143               | 3,412,307               | 2,771,984               | 3,724,520               | 1,850,820               | 4,396,725               | 2,223,002               |
| creatine                                            | C00300          | 13,447,444,932          | 15,795,616,284          | 15,129,010,813          | 15,055,397,915          | 13,128,616,848          | 14,770,073,842          | 15,854,576,512          | 17,783,164,417          |
| Creatinine                                          | C00791          | 89,435,655              | 123,412,056             | 109,558,458             | 94,083,401              | 42,823,184              | 121,289,550             | 154,215,440             | 182,075,803             |
| CTP                                                 | C00063          | 0                       | 0                       | 0                       | 0                       | 0                       | 0                       | 0                       | 9,884                   |
| cystathionine                                       | C00542          | 1,875,986               | 1,333,870               | 1,428,253               | 1,865,283               | 940,383                 | 2,362,384               | 2,503,396               | 9,387,183               |
| cysteine                                            | C00736-C00097   | 2,439,433               | 1,903,343               | 3,043,142               | 4,006,167               | 2,360,352               | 2,083,096               | 3,959,283               | 2,924,349               |
| cytine                                              | C01420          | 571,459                 | 281,102                 | 518,626                 | 587,694                 | 390,378                 | 235,526                 | 752,245                 | 331,238                 |
| cytidine                                            | C00475          | 9,142,418               | 15,990,816              | 16,812,927              | 14,723,832              | 7,460,931               | 13,539,232              | 14,073,589              | 27,695,508              |
| cytosine                                            | C00380          | 528,976                 | 660,425                 | 751,427                 | 582,589                 | 512,493                 | 691,669                 | 813,473                 | 1,227,657               |
| dADP                                                | C00206          | 0                       | 0                       | 0                       | 0                       | 0                       | 0                       | 0                       | 0                       |
| dAMP                                                | C00360          | 515,287                 | 166,546                 | 374,940                 | 674,087                 | 807,870                 | 843,673                 | 522,384                 | 234,044                 |
| D-arabinono-1,4-lactone                             | C00652          | 105,913,981             | 114,015,451             | 124,381,975             | 106,897,802             | 54,916,818              | 63,265,218              | 73,591,195              | 101,436,795             |
| dATP                                                | C00131          | 0                       | 0                       | 0                       | 0                       | 0                       | 0                       | 0                       | 0                       |
| dCMP                                                | C00239          | 0                       | 0                       | 0                       | 0                       | 0                       | 0                       | 0                       | 0                       |
| dCTP                                                | C00458          | 0                       | 0                       | 0                       | 0                       | 0                       | 0                       | 0                       | 0                       |
| deoxyguanosine                                      | C00330          | 992,448,792             | 1,124,785,734           | 1,125,453,604           | 1,260,253,890           | 799,025,488             | 1,020,895,363           | 1,312,271,414           | 1,336,877,616           |
| deoxyuridine                                        | C00526          | 1,143,121               | 1,413,785               | 2,744,112               | 1,566,750               | 907,902                 | 1,104,869               | 1,859,937               | 7,390,189               |
| D-glucosamine-6-phosphate                           | C00352          | 188,286                 | 26,034                  | 57,160                  | 0                       | 39,267                  | 27,548                  | 21,250                  | 15,590                  |
| dihydroorotate                                      | C00337          | 26,426                  | 0                       | 26,657                  | 25,290                  | 0                       | 0                       | 28,633                  | 0                       |
| DL-DOPA                                             | C00355          | 46,526                  | 18,990                  | 0                       | 30,143                  | 114,802                 | 97,439                  | 107,549                 | 22,698                  |
| D-sedoheptulose-7-phosphate                         | C05382          | 963,746                 | 1,473,730               | 1,474,940               | 1,341,985               | 1,084,859               | 1,506,380               | 1,693,140               | 1,647,419               |
| dTMP                                                | C00364          | 0                       | 0                       | 0                       | 0                       | 0                       | 0                       | 0                       | 0                       |
| dTTP                                                | C00459          | 0                       | 0                       | 0                       | 0                       | 0                       | 0                       | 0                       | 0                       |
| dUMP                                                | C00365          | 0                       | 0                       | 0                       | 0                       | 0                       | 0                       | 0                       | 0                       |
| epinephrine                                         | C00788          | 22,470                  | 11,208                  | 37,825                  | 32,796                  | 32,614                  | 17,236                  | 12,135                  | 0                       |
| FAD                                                 | C00016          | 0                       | 78,034                  | 58,322                  | 0                       | 74,175                  | 146,230                 | 108,897                 | 122,305                 |
| FMN                                                 | C00061          | 0                       | 0                       | 0                       | 0                       | 0                       | 0                       | 0                       | 0                       |
| fumaric acid                                        | C00122          | 85,907,695              | 96,537,411              | 98,654,595              | 129,170,802             | 103,062,224             | 97,023,778              | 161,443,425             | 124,825,871             |
| GABA                                                | C00334          | 1,363,841,197           | 1,546,970,627           | 1,556,689,559           | 1,502,112,809           | 1,338,257,441           | 1,667,460,177           | 1,591,375,639           | 2,054,661,149           |
| GDP                                                 | C00035          | 6,852,934               | 8,255,043               | 7,477,870               | 8,870,204               | 8,649,455               | 8,505,338               | 12,038,876              | 12,950,516              |
| glucano-lactone                                     | C00198          | 2,056,628               | 2,513,168               | 2,512,305               | 1,801,774               | 679,362                 | 1,061,552               | 1,604,443               | 1,402,437               |
| glutamine                                           | C00303          | 1,633,413,569           | 1,951,382,025           | 2,002,231,354           | 1,855,567,842           | 1,690,279,279           | 2,016,100,037           | 2,466,110,458           | 5,601,767,768           |
| glutaminic acid                                     | C00302          | 1,827,527,809           | 2,331,782,146           | 2,293,498,839           | 2,147,148,210           | 1,844,285,539           | 2,160,746,918           | 2,512,856,981           | 2,781,540,499           |
| glutathione                                         | C00051          | 239,488,167             | 321,450,379             | 320,557,628             | 314,281,824             | 228,175,887             | 304,122,948             | 342,906,189             | 428,762,181             |
| glutathione disulfide                               | C00127          | 7,225,045               | 10,924,470              | 10,045,570              | 7,001,304               | 10,792,385              | 16,827,797              | 18,351,895              | 20,873,638              |
| glyceric acid                                       | C00258          | 8,202,965               | 10,973,816              | 9,346,125               | 8,446,219               | 6,626,909               | 7,235,080               | 8,784,236               | 8,791,267               |
| glycine                                             | C00037          | 15,491,759              | 19,640,216              | 20,568,309              | 16,238,240              | 19,051,738              | 23,373,022              | 33,752,411              | 28,449,726              |
| GMP                                                 | C00144          | 36,006,512              | 44,033,239              | 46,833,505              | 39,092,226              | 35,225,021              | 40,650,320              | 47,376,047              | 49,522,059              |
| GTP                                                 | C00044          | 820,048                 | 761,809                 | 878,095                 | 927,090                 | 841,001                 | 859,536                 | 860,393                 | 1,525,558               |
| guanine                                             | C00242          | 265,581                 | 489,519                 | 469,447                 | 309,859                 | 624,986                 | 749,374                 | 872,101                 | 981,257                 |
| guanosine                                           | C00387          | 7,596,991               | 9,431,155               | 10,460,775              | 11,523,086              | 4,107,836               | 8,947,820               | 7,776,504               | 15,891,148              |
| histamine                                           | C00388          | 3,950,619               | 3,864,226               | 3,490,019               | 4,057,121               | 3,331,630               | 3,286,096               | 3,809,032               | 9,127,603               |
| histidine                                           | C00768          | 447,693,671             | 524,541,240             | 559,897,674             | 557,048,235             | 406,227,182             | 482,285,591             | 596,402,001             | 886,635,570             |
| homocysteine                                        | C05330          | 45,977                  | 37,519                  | 0                       | 0                       | 0                       | 103,790                 | 28,388                  | 364,176                 |
| hydroxyphenyllactic acid                            | C03672          | 15,175,351              | 18,977,340              | 19,125,536              | 17,798,966              | 12,220,058              | 14,011,719              | 11,764,725              | 16,100,138              |
| hypoxanthine                                        | C00262          | 90,774,843              | 121,234,392             | 148,179,816             | 115,559,035             | 150,934,623             | 193,117,196             | 180,587,476             | 252,634,853             |
| IDP                                                 | C00104          | 0                       | 0                       | 0                       | 0                       | 0                       | 0                       | 0                       | 0                       |
| IMP                                                 | C00130          | 28,852,690              | 19,008,037              | 21,872,390              | 16,545,855              | 19,488,222              | 8,866,993               | 15,757,709              | 14,740,789              |
| inosine                                             | C00294          | 71,620,648              | 78,873,580              | 105,965,339             | 85,564,073              | 57,637,121              | 91,180,156              | 80,542,977              | 158,721,315             |
| kynurenine                                          | C01718          | 55,300                  | 66,031                  | 89,240                  | 107,019                 | 53,478                  | 157,041                 | 130,751                 | 2,202,793               |
| lactic acid                                         | C01432          | 3,957,481,241           | 4,411,176,425           | 4,462,737,208           | 4,271,741,127           | 2,988,261,810           | 4,563,084,108           | 5,152,564,524           | 5,884,212,838           |
| L-arginino-succinate                                | C03406          | 1,579,831               | 2,196,708               | 2,299,970               | 2,270,899               | 1,717,292               | 1,983,410               | 2,834,528               | 3,017,605               |
| levulinic acid                                      | n/a             | 0                       | 0                       | 1,566,139               | 904,323                 | 872,914                 | 3,414,441               | 0                       | 1,702,789               |
| L-NMMA                                              | C03884          | 4,629,646               | 4,397,463               | 4,621,045               | 4,536,677               | 3,073,488               | 4,011,370               | 7,399,016               | 6,353,360               |
| lysine                                              | C00047/C00739   | 101,130,992             | 102,918,446             | 107,093,456             | 89,251,546              | 85,287,528              | 108,435,452             | 154,196,485             | 144,324,520             |
| maleic acid                                         | C01384          | 0                       | 0                       | 0                       | 1,525,338               | 0                       | 0                       | 0                       | 0                       |
| malic acid                                          | C00711          | 1,009,279               | 11,705,340              | 13,130,203              | 14,544,791              | 13,061,583              | 12,346,241              | 14,697,945              | 17,903,667              |
| methionine                                          | C00073          | 35,657,506              | 43,712,720              | 46,831,093              | 40,581,132              | 33,253,560              | 43,078,961              | 52,965,012              | 53,502,831              |
| methylglyoxal                                       | C00546          | 262,884                 | 275,072                 | 214,675                 | 345,795                 | 77,655                  | 124,486                 | 186,502                 | 213,975                 |
| mevalonic acid                                      | C00418          | 502,693                 | 780,677                 | 595,215                 | 883,762                 | 487,127                 | 658,603                 | 604,832                 | 681,098                 |
| N-acetylspartic acid                                | C01042          | 9,376,816,824           | 10,455,225,059          | 10,608,157,311          | 9,745,007,744           | 8,432,551,632           | 9,640,666,620           | 10,967,827,441          | 12,419,167,663          |

|                               |        |               |               |               |               |               |               |               |               |
|-------------------------------|--------|---------------|---------------|---------------|---------------|---------------|---------------|---------------|---------------|
| N-acetylaspartylglutamic acid | C12270 | 2,559,805     | 3,999,847     | 4,205,742     | 3,045,890     | 1,962,251     | 2,235,445     | 2,375,569     | 5,200,647     |
| N-acetyl-DL-alanine           | n/a    | 4,034,307     | 5,235,471     | 5,271,576     | 5,544,716     | 3,352,692     | 4,772,855     | 4,727,454     | 6,446,052     |
| NAD+                          | C00003 | 3,168,963     | 4,810,802     | 4,354,923     | 4,012,039     | 2,804,783     | 4,640,501     | 3,256,800     | 5,378,023     |
| NADH                          | C00004 | 54,042        | 353,948       | 67,254        | 115,307       | 558,486       | 652,423       | 816,487       | 1,472,849     |
| NADP+                         | C00006 | 539,227       | 694,326       | 468,541       | 621,283       | 499,468       | 616,298       | 723,903       | 782,197       |
| NADPH                         | C00005 | 0             | 48,727        | 62,286        | 70,996        | 77,279        | 37,576        | 17,052        | 0             |
| N-carbamoyl-L-aspartate       | C00438 | 0             | 0             | 0             | 0             | 0             | 0             | 0             | 0             |
| nicotinamide                  | C00153 | 291,498,477   | 321,677,540   | 359,812,861   | 320,817,228   | 329,115,310   | 332,960,403   | 488,201,581   | 450,000,632   |
| N-methyltryptamine            | C06213 | 6,217         | 6,904         | 7,365         | 14,619        | 11,572        | 8,780         | 0             | 17,573        |
| norepinephrine                | C00547 | 93,681        | 115,308       | 163,488       | 112,133       | 118,619       | 92,925        | 36,698        | 175,863       |
| ornithine                     | C01602 | 4,994,856     | 8,267,196     | 8,971,962     | 6,012,984     | 4,138,248     | 6,254,713     | 6,002,810     | 6,057,181     |
| orotic acid                   | C00295 | 2,861,654     | 3,502,861     | 3,487,754     | 3,792,731     | 2,373,319     | 3,291,925     | 3,205,375     | 3,024,776     |
| orotidylic acid               | C01103 | 0             | 0             | 0             | 0             | 0             | 0             | 0             | 0             |
| oxalacetic acid               | C00036 | 139,186       | 126,127       | 101,954       | 78,926        | 149,756       | 285,787       | 115,965       | 0             |
| pantothenic acid              | C00864 | 53,393,629    | 66,355,345    | 65,885,127    | 55,048,694    | 73,273,236    | 85,198,895    | 83,310,670    | 214,224,065   |
| phenethylamine                | C05332 | 379,396       | 450,463       | 451,119       | 395,152       | 401,178       | 430,278       | 470,857       | 430,360       |
| phenylalanine                 | C02057 | 49,990,483    | 69,161,322    | 74,909,280    | 65,532,125    | 51,148,271    | 76,618,846    | 89,549,653    | 208,630,017   |
| phosphocreatine               | C02305 | 579,884       | 647,778       | 607,525       | 472,663       | 942,220       | 726,778       | 480,346       | 724,020       |
| phosphoenolpyruvate           | C00074 | 57,087        | 1,116,434     | 854,044       | 297,910       | 2,606,547     | 3,477,722     | 5,992,997     | 13,782,009    |
| phosphorylcholine+            | C00588 | 295,268,296   | 460,821,113   | 463,299,857   | 417,720,937   | 370,723,689   | 555,882,039   | 856,753,358   | 957,869,704   |
| proline                       | C16435 | 119,281,141   | 161,303,433   | 159,997,543   | 132,959,750   | 94,079,947    | 132,237,987   | 158,336,458   | 264,889,816   |
| PRPP                          | C00119 | 0             | 0             | 0             | 0             | 0             | 0             | 0             | 0             |
| putrescine                    | C00134 | 96,407        | 29,473        | 88,728        | 20,483        | 85,327        | 195,975       | 18,626        | 56,778        |
| pyruvic acid                  | C00022 | 28,202,922    | 22,161,757    | 16,837,752    | 25,994,696    | 7,413,031     | 12,269,335    | 16,392,178    | 25,300,866    |
| S-adenosyl-L-homocysteine     | C00021 | 236,995       | 481,490       | 470,563       | 360,824       | 219,725       | 695,482       | 419,951       | 1,318,196     |
| S-adenosyl-L-methionine+      | C00019 | 0             | 187,129       | 229,507       | 339,872       | 214,550       | 178,148       | 392,238       | 230,936       |
| serine                        | C00716 | 69,917,271    | 80,914,522    | 86,860,369    | 80,132,323    | 92,850,197    | 102,431,269   | 115,571,550   | 97,559,642    |
| serotonin                     | C00780 | 73,031        | 94,425        | 44,367        | 43,799        | 70,350        | 24,880        | 24,623        | 39,563        |
| spermidine                    | C00315 | 102,508,961   | 93,394,055    | 115,278,143   | 159,406,986   | 103,389,583   | 98,559,813    | 91,751,751    | 85,011,415    |
| spermine                      | C00750 | 19,339,643    | 15,085,037    | 21,045,199    | 14,978,731    | 22,931,370    | 19,536,470    | 27,647,714    | 19,933,526    |
| succinic acid                 | C00042 | 1,289,215,393 | 1,937,908,967 | 1,837,071,583 | 1,386,643,010 | 1,294,558,225 | 2,072,764,686 | 1,765,155,125 | 2,959,824,088 |
| thiamine+                     | C00378 | 12,298,582    | 14,235,088    | 15,393,670    | 12,610,923    | 12,060,207    | 16,239,474    | 18,914,866    | 17,606,317    |
| thymidine                     | C00214 | 944,639       | 916,254       | 1,910,454     | 1,172,623     | 694,026       | 987,815       | 1,377,739     | 5,515,359     |
| thymine                       | C00178 | 704,449       | 800,739       | 1,383,199     | 767,767       | 637,758       | 725,637       | 1,011,800     | 3,329,126     |
| tryptamine                    | C00398 | 10,260        | 21,905        | 11,938        | 12,986        | 35,252        | 27,884        | 21,484        | 34,875        |
| tryptophan                    | C00806 | 10,341,372    | 15,910,967    | 16,057,172    | 14,842,478    | 8,947,045     | 15,844,346    | 22,069,618    | 46,459,970    |
| tyramine                      | C00483 | 575,992       | 551,200       | 574,717       | 304,227       | 999,017       | 405,305       | 574,040       | 316,755       |
| tyrosine                      | C01536 | 28,878,040    | 38,855,524    | 38,771,718    | 34,511,169    | 28,369,355    | 37,622,702    | 31,227,728    | 46,060,699    |
| UDP                           | C00015 | 419,847       | 553,580       | 528,919       | 303,516       | 582,661       | 464,010       | 662,434       | 1,052,398     |
| UDP-D-glucose                 | C00029 | 1,270,312     | 1,990,118     | 1,763,501     | 1,530,374     | 1,022,994     | 1,711,995     | 1,936,192     | 1,814,802     |
| UMP                           | C00105 | 3,486,271     | 3,135,127     | 3,269,653     | 2,635,173     | 3,651,848     | 2,392,191     | 4,393,651     | 2,547,084     |
| uracil                        | C00106 | 24,178,266    | 38,620,665    | 42,453,033    | 35,097,557    | 23,371,051    | 42,668,665    | 35,265,332    | 73,441,253    |
| uric acid                     | C00366 | 1,506,946     | 2,252,259     | 2,464,075     | 1,676,617     | 2,241,740     | 3,300,160     | 3,460,686     | 6,580,823     |
| uridine                       | C00299 | 22,964,308    | 34,608,322    | 37,530,621    | 32,052,382    | 20,401,569    | 38,632,363    | 38,619,704    | 63,382,303    |
| UTP                           | C00075 | 15,980        | 18,114        | 0             | 0             | 0             | 0             | 0             | 0             |
| valine                        | C16436 | 13,412,245    | 16,488,450    | 12,761,287    | 9,898,551     | 7,286,406     | 14,321,239    | 20,763,858    | 24,118,125    |
| xanthine                      | C00385 | 41,260,080    | 50,821,648    | 49,220,920    | 55,564,204    | 61,167,998    | 68,555,454    | 75,244,405    | 65,543,503    |
| XMP                           | C00655 | 0             | 0             | 34,361        | 18,427        | 0             | 6,692         | 0             | 74,811        |
